# Supplementary material for: The spatiotemporal profile of Dendrobium huoshanense and functional identification of bHLH genes under exogenous MeJA using comparative transcriptomics and genomics
Source: Front Plant Sci. 2023 May 10;14:1169386. doi: 10.3389/fpls.2023.1169386 (PMC10206334; doi:10.3389/fpls.2023.1169386)
Supplement: Supplementary Table 5 — Correlation coefficients among different sample groups. [file Table_5.xlsx]

## Sheet: Table S8
gene_id	Gene name	Mean_Control	Mean_T1	Mean_T2	Mean_T3	Mean_T4	Mean_T5	Mean_T6	Mean_T7
Dhu000000409	DhbHLH22	0.9	1.793	1.797	3.983	5.963	6.587	4.497	2.94
Dhu000000438	DhbHLH65	0.323	0.207	0.213	0.34	0.18	0.13	0.08	0.03
Dhu000000488	DhbHLH12	39.95	22.837	34.607	17.197	33.293	10.54	7.73	14.143
Dhu000001854	DhbHLH70	66.793	69.9	64.92	39.177	63.703	71.26	91.56	98.387
Dhu000002472	DhbHLH40	2.323	1.97	2.427	2.787	2.33	2.457	1.197	1.807
Dhu000002657	DhbHLH81	46.833	54.88	49.09	84.587	45.217	23.043	18.97	28.907
Dhu000004236	DhbHLH06	32.007	34.3	30.85	57.717	33.943	29.89	41.05	39.107
Dhu000004539	DhbHLH29	2.08	1.097	1.093	1.43	3.003	0.9	1.073	1.553
Dhu000005326	DhbHLH71	12.687	11.843	3.863	11.32	5.76	5.357	1.54	1.99
Dhu000006238	DhbHLH77	8.543	13.02	5.597	11.83	11.317	10.003	7.557	7.197
Dhu000006391	DhbHLH68	22.5	20.703	26.323	17.967	18.187	12.867	15.46	21.273
Dhu000006511	DhbHLH04	9.573	8.867	9.113	6.303	7.877	9.65	8.967	9.62
Dhu000007057	DhbHLH63	10.713	14.557	13.203	8.6	10.3	5.507	2.53	4.657
Dhu000008361	DhbHLH36	36.337	31.69	30.083	30.943	33.067	29.577	27.593	21.19
Dhu000008377	DhbHLH13	11.627	5.837	23.417	30.98	26.357	19.177	15.097	16.853
Dhu000008463	DhbHLH51	2.36	5.183	1.777	10.007	4.193	6.06	6.963	2.893
Dhu000008887	DhbHLH03	1.23	0.9	0.88	1.66	0.957	0.493	0.163	0.157
Dhu000008892	DhbHLH21	158.067	205.833	156.66	188.87	135.177	217.417	226.093	164.437
Dhu000009252	DhbHLH26	6.273	5.917	9.747	18.04	8.137	3.843	3.033	5.53
Dhu000009253	DhbHLH27	60.003	35.547	55.82	65.143	58.297	62.263	38.28	55.44
Dhu000009255	DhbHLH25	0.133	0.183	0.257	2.257	0.513	0.263	0.673	1.177
Dhu000010329	DhbHLH60	1.897	3.21	1.193	7.57	6.22	3.25	1.563	5.993
Dhu000012544	DhbHLH11	24.457	30.203	31.87	56.16	32.04	14.193	13.483	23.277
Dhu000013057	DhbHLH08	0	0.023	0	0	0	0	0	0
Dhu000013409	DhbHLH72	6.2	9.777	0.877	22.247	4.447	1.183	4.027	1.28
Dhu000013458	DhbHLH73	0.27	0.433	0	0.593	0.587	0.27	1.283	0.44
Dhu000013995	DhbHLH82	68.93	63.37	69.683	44.75	55.32	31.91	8.027	19.237
Dhu000014415	DhbHLH17	3.787	5.767	4.017	4.793	5.463	1.673	0.5	1.757
Dhu000014827	DhbHLH54	3.277	4.183	2.597	11.963	4.74	1.29	2.697	2.15
Dhu000016172	DhbHLH53	3.077	2.483	8.827	1.46	2.973	6.747	2.48	5.287
Dhu000016644	DhbHLH15	1.64	2.683	5.703	4.357	6.09	5.273	3.553	5.02
Dhu000016843	DhbHLH37	12.847	11.84	13.853	17.773	19.843	11.667	9.463	11.027
Dhu000017060	DhbHLH01	17.257	15.033	11.577	27.93	24.837	11.657	3.277	5.51
Dhu000017281	DhbHLH33	2.947	3.087	1.603	4.51	3.213	2.843	2.74	1.26
Dhu000017368	DhbHLH76	21.063	16.29	28.597	13.99	26.193	17.077	18.103	22.657
Dhu000018107	DhbHLH75	23.563	19.813	38.6	17.353	30.617	21.477	20.997	28.643
Dhu000020424	DhbHLH35	3.827	3.343	5.39	2.48	2.15	1.15	1.073	1.017
Dhu000020954	DhbHLH52	78.153	62.47	62.357	38.09	52.72	66.95	77.897	92.803
Dhu000022201	DhbHLH28	65.03	43.16	62.127	79.463	66.323	57.633	36.82	48.95
Dhu000022254	DhbHLH14	0	0.03	0	0.093	0	0	0	0.03
Dhu000022792	DhbHLH44	1.347	1.303	2.177	1.373	1.3	1.43	1.017	0.783
Dhu000023214	DhbHLH38	8.877	8.7	10.97	11.993	12.69	8.09	6.89	6.993
Dhu000023368	DhbHLH30	22.78	21.547	21	26.71	21.977	39.49	38.347	30.403
Dhu000023801	DhbHLH62	0.083	0.007	0	0.02	0.043	0	0.02	0
Dhu000024654	DhbHLH46	16.173	25.093	29.897	10.013	30.393	69.02	78.733	20.03
Dhu000025229	DhbHLH64	0	0.063	0.023	0.083	0.02	0.107	0.13	0.063
Dhu000025881	DhbHLH48	175.43	210.373	94.403	163.973	84.72	35.033	9.777	5.34
Dhu000025992	DhbHLH45	16.63	15.133	14.327	23.6	13.6	13.52	11.03	12.37
Dhu000026101	DhbHLH16	32.25	44.163	26.14	32.343	40.67	16.087	5.25	14.08
Dhu000026248	DhbHLH19	0.747	0.58	0.93	0.527	0.387	0.193	0.537	0.637
Dhu000026646	DhbHLH80	108.19	113.687	101.003	160.93	85.513	39.617	28.017	40.193
Dhu000026729	DhbHLH74	0	0	0	0	0	0	0	0.017
Dhu000026758	DhbHLH56	19.537	21.86	21.1	12.067	11.737	8.643	5.18	5.097
Dhu000027331	DhbHLH50	0.643	1.08	2.693	5.033	2.35	0.603	1.163	1.34
Dhu000027551	DhbHLH24	0.207	0.29	0.59	1.85	0.727	0.413	0.44	1.1
Dhu000027579	DhbHLH02	0.09	0.09	0.73	0.12	0.147	0.443	0.363	0.27
Dhu000028189	DhbHLH23	4.957	5.72	6.877	4.437	11.523	13.377	16.53	12.817
